# Supplementary material for: Assessing suicidality during the SARS-CoV-2 pandemic: Lessons learned from adaptation and implementation of a telephone-based suicide risk assessment and response protocol in Malawi
Source: PubMed Central journal article supplement (PMC10022777; doi:10.1371/journal.pone.0281711), 2023-03-17

**Supplemental File 2: Decision Tree for SHARP Safety Response Protocol for Phone Interviews**

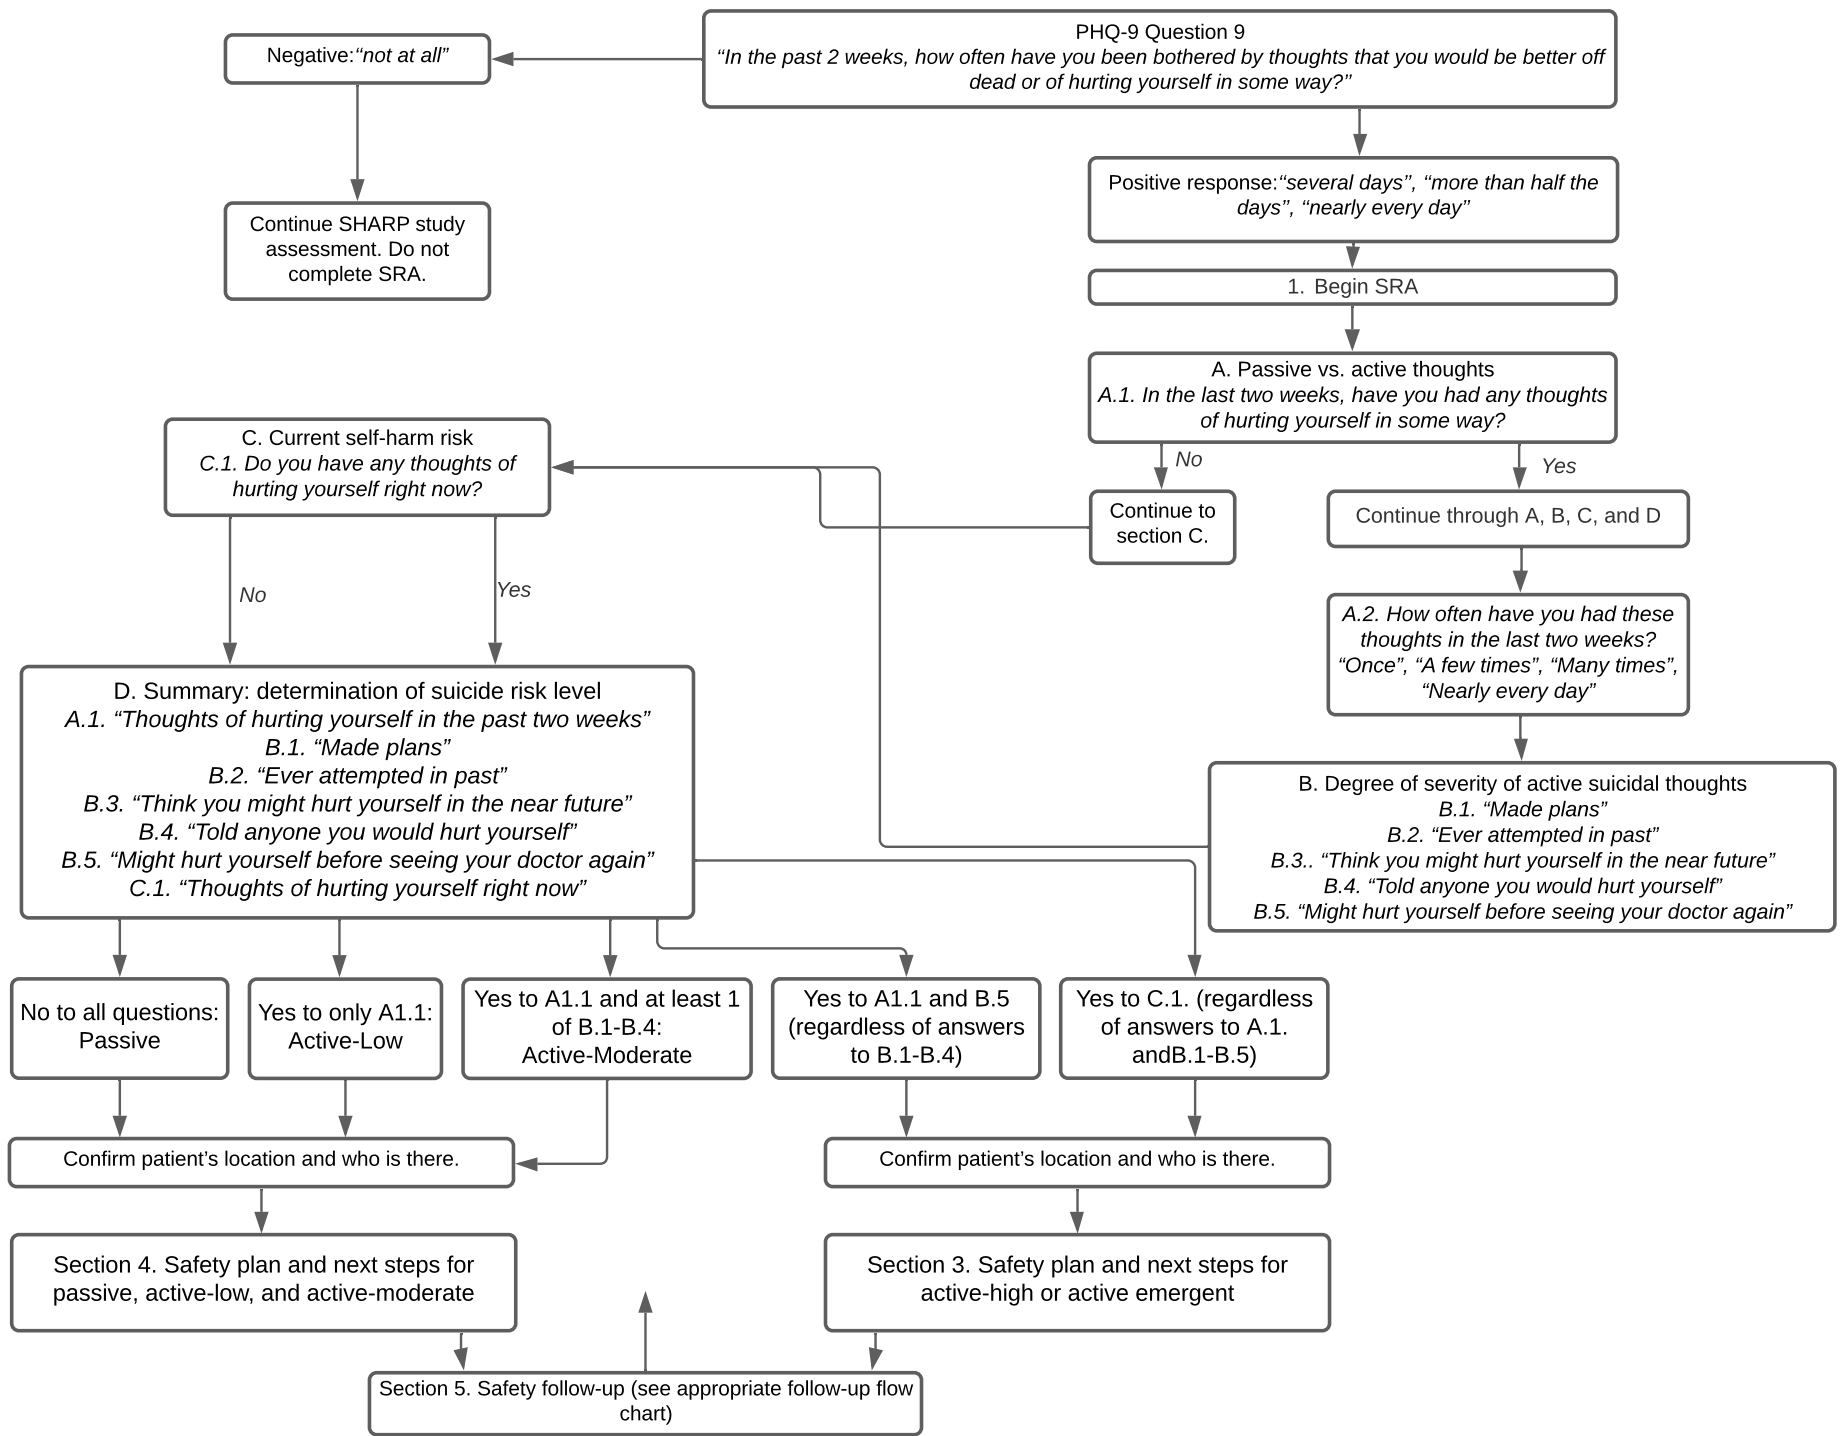

Supplement: pone.0281711.s002.pdf [file pone.0281711.s002.pdf]
