# Supplementary material for: Assessing suicidality during the SARS-CoV-2 pandemic: Lessons learned from adaptation and implementation of a telephone-based suicide risk assessment and response protocol in Malawi
Source: PubMed Central journal article supplement (PMC10022777; doi:10.1371/journal.pone.0281711), 2023-03-17
Supplement: pone.0281711.s003.pdf [file pone.0281711.s003.pdf]

**Supplemental File 3: SHARP Safety Response Protocol for Phone Interviews Decision Tree for Passive and Active-Low Suicide Risk Follow-Up.**

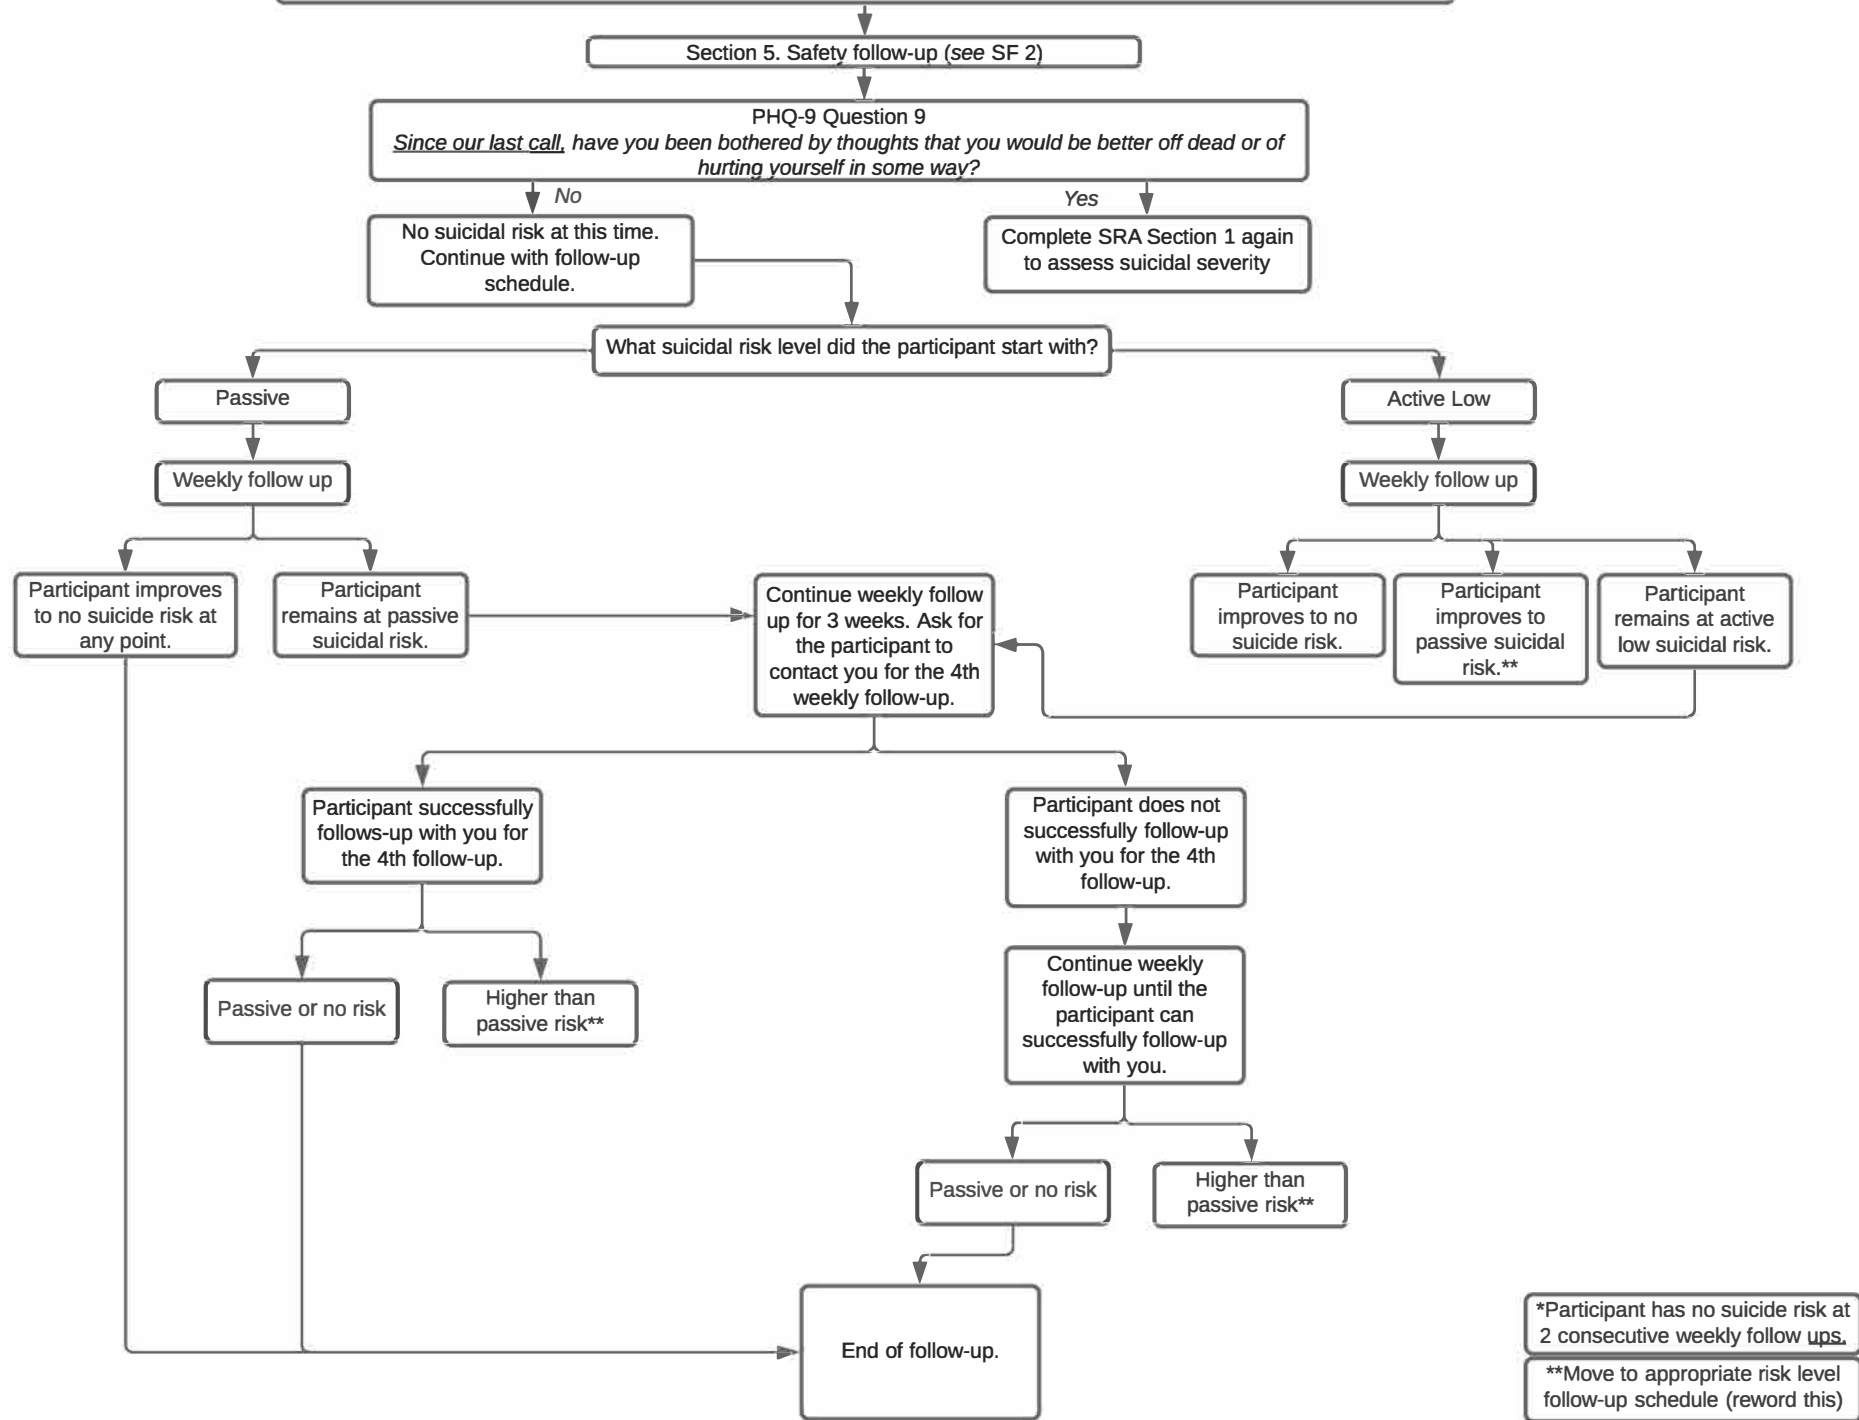

\*Participant has no suicide risk at 2 consecutive weekly follow ups.  
 \*\*Move to appropriate risk level follow-up schedule (reword this)
